# Supplementary material for: Molecular basis of Arginine and Lysine DNA sequence-dependent thermo-stability modulation
Source: PubMed Central journal article supplement (PMC8782489; doi:10.1371/journal.pcbi.1009749), 2022-01-10
Supplement: pcbi.1009749.s001.pdf [file pcbi.1009749.s001.pdf]

**S1 Table.** Details of each simulation performed in this work with relative ID in the BigNASim database.

| Single duplex                                    |         |               |           |        |          |                             |
|--------------------------------------------------|---------|---------------|-----------|--------|----------|-----------------------------|
| Duplex                                           | Cation  | Concentration | Time      | #H2O   | #Cations | ID                          |
| AT-rich                                          | Na      | 25 mM         | 400 ns    | 19352  | 47       | AT-rich_Na_25mM             |
| AT-rich                                          | Lys     | 25 mM         | 400 ns    | 19299  | 9        | AT-rich_Lys_25mM            |
| AT-rich                                          | Arg     | 25 mM         | 400 ns    | 19286  | 9        | AT-rich_Arg_25mM            |
| AT-rich                                          | Orn     | 25 mM         | 400 ns    |        | 9        | AT-rich_Orn_25mM            |
| AT-rich                                          | DABA    | 25 mM         | 400 ns    |        | 9        | AT-rich_DABA_25mM           |
| GC-rich                                          | Na      | 25 mM         | 400 ns    | 19359  | 47       | GC-rich_Na_25mM             |
| GC-rich                                          | Lys     | 25 mM         | 400 ns    | 19313  | 9        | GC-rich_Lys_25mM            |
| GC-rich                                          | Arg     | 25 mM         | 400 ns    | 19295  | 9        | GC-rich_Arg_25mM            |
| GC-rich                                          | Orn     | 25 mM         | 400 ns    |        | 9        | GC-rich_Orn_25mM            |
| GC-rich                                          | DABA    | 25 mM         | 400 ns    |        | 9        | GC-rich_DABA_25mM           |
| AT-rich                                          | Na      | 500 mM        | 400 ns    | 19016  | 215      | AT-rich_Na_500mM            |
| AT-rich                                          | Lys     | 500 mM        | 400 ns    | 17765  | 177      | AT-rich_Lys_500mM           |
| AT-rich                                          | Arg     | 500 mM        | 400 ns    | 17582  | 177      | AT-rich_Arg_500mM           |
| AT-rich                                          | Orn     | 500 mM        | 400 ns    |        | 177      | AT-rich_Orn_500mM           |
| AT-rich                                          | DABA    | 500 mM        | 400 ns    |        | 177      | AT-rich_DABA_500mM          |
| GC-rich                                          | Na      | 500 mM        | 400 ns    | 19023  | 215      | GC-rich_Na_500mM            |
| GC-rich                                          | Lys     | 500 mM        | 400 ns    | 17755  | 177      | GC-rich_Lys_500mM           |
| GC-rich                                          | Arg     | 500 mM        | 400 ns    | 17541  | 177      | GC-rich_Arg_500mM           |
| GC-rich                                          | Orn     | 500 mM        | 400 ns    |        | 177      | GC-rich_Orn_50mM            |
| GC-rich                                          | DABA    | 500 mM        | 400 ns    |        | 177      | GC-rich_DABA_500mM          |
| AT-rich                                          | Na      | 1500 mM       | 400 ns    | 18310  | 568      | AT-rich_Na_1500mM           |
| AT-rich                                          | Lys     | 1500 mM       | 400 ns    | 14431  | 530      | AT-rich_Lys_1500mM          |
| AT-rich                                          | Arg     | 1500 mM       | 400 ns    | 13777  | 530      | AT-rich_Arg_1500mM          |
| AT-rich                                          | Orn     | 1500 mM       | 400 ns    |        | 530      | AT-rich_Orn_1500mM          |
| AT-rich                                          | DABA    | 1500 mM       | 400 ns    |        | 530      | AT-rich_DABA_1500mM         |
| GC-rich                                          | Na      | 1500 mM       | 400 ns    | 18317  | 568      | GC-rich_Na_1500mM           |
| GC-rich                                          | Lys     | 1500 mM       | 400 ns    | 14421  | 530      | GC-rich_Lys_1500mM          |
| GC-rich                                          | Arg     | 1500 mM       | 400 ns    | 13819  | 530      | GC-rich_Arg_1500mM          |
| GC-rich                                          | Orn     | 1500 mM       | 400 ns    |        | 530      | GC-rich_Orn_1500mM          |
| GC-rich                                          | DABA    | 1500 mM       | 400 ns    |        | 530      | GC-rich_DABA_1500mM         |
| 15 duplexes - condensation assay MD (with CUFIX) |         |               |           |        |          |                             |
| AT-rich                                          | Neutral | 500 mM        | 5 $\mu$ s | 125229 | 330 (Na) | AT-rich_crowd_neut_500mM    |
| AT-rich                                          | Na      | 500 mM        | 5 $\mu$ s | 123605 | 1142     | AT-rich_crowd_Na_500mM      |
| AT-rich                                          | Lys     | 500 mM        | 5 $\mu$ s | 114861 | 1142     | AT-rich_crowd_Lys_500mM     |
| AT-rich                                          | Arg     | 500 mM        | 5 $\mu$ s | 113646 | 1142     | AT-rich_crowd_Arg_500mM     |
| GC-rich                                          | Neutral | 500 mM        | 5 $\mu$ s | 125202 | 330 (Na) | GC-rich_crowd_neut_500mM    |
| GC-rich                                          | Na      | 500 mM        | 5 $\mu$ s | 123578 | 1142     | GC-rich_crowd_neut_Na_500mM |
| GC-rich                                          | Lys     | 500 mM        | 5 $\mu$ s | 115011 | 1142     | GC-rich_crowd_Lys_500mM     |
| GC-rich                                          | Arg     | 500 mM        | 5 $\mu$ s | 113692 | 1142     | GC-rich_crowd_Arg_500mM     |
