# Supplementary material for: Molecular basis of Arginine and Lysine DNA sequence-dependent thermo-stability modulation
Source: PubMed Central journal article supplement (PMC8782489; doi:10.1371/journal.pcbi.1009749), 2022-01-10
Supplement: pcbi.1009749.s002.pdf [file pcbi.1009749.s002.pdf]

**S2 Table.** Melting temperatures in NaP conditions, 650 mM of NaCl and 650 mM of ArgCl.

| %GC | Sequence                 | NaP                    | NaCl                   |                         | Arg                    |                         |
|-----|--------------------------|------------------------|------------------------|-------------------------|------------------------|-------------------------|
|     |                          | T <sub>m</sub><br>(°C) | T <sub>m</sub><br>(°C) | ΔT <sub>m</sub><br>(°C) | T <sub>m</sub><br>(°C) | ΔT <sub>m</sub><br>(°C) |
| 10  | d(TATGTATATTTTGTAATTAA)  | 34                     | 60                     | 26                      | 54                     | 20                      |
| 20  | d(TATTTTCATTTGTTCTGTAAT) | 37                     | 64                     | 27                      | 57                     | 20                      |
| 30  | d(CATTTCCCTTTGTTCTGTAAT) | 40                     | 67                     | 27                      | 60                     | 20                      |
| 40  | d(CGTTTCCTTTGTTCTGTAGT)  | 44                     | 70                     | 26                      | 63                     | 19                      |
| 50  | d(CGTTCCCTTTGTTCTGGAGT)  | 48                     | 72                     | 24                      | 65                     | 17                      |
| 60  | d(GTCCACTCTCGGTGCAACTG)  | 55                     | 79                     | 24                      | 69                     | 14                      |
| 70  | d(GTCCACGCTCGGTGCGACTG)  | 63                     | 84                     | 21                      | 73                     | 10                      |
| 80  | d(GTCCACGCCCGGTGCGACGG)  | 67                     | 87                     | 20                      | 75                     | 8                       |
