# Supplementary material for: Molecular basis of Arginine and Lysine DNA sequence-dependent thermo-stability modulation
Source: PubMed Central journal article supplement (PMC8782489; doi:10.1371/journal.pcbi.1009749), 2022-01-10
Supplement: pcbi.1009749.s003.pdf [file pcbi.1009749.s003.pdf]

**S3 Table.** Sequence-averaged major and minor groove width values for AT-rich and CG-rich sequences.

|              | Arg   | sd                 | Lys   | sd   | Na    | sd   |
|--------------|-------|--------------------|-------|------|-------|------|
|              |       | Major groove width |       |      |       |      |
| AT-rich 0.5M | 12.37 | 1.45               | 12.52 | 1.35 | 12.49 | 1.51 |
| AT-rich 1.5M | 12.52 | 1.22               | 12.31 | 1.32 | 12.28 | 1.44 |
| GC-rich 0.5M | 11.56 | 1.48               | 11.68 | 1.38 | 11.84 | 1.57 |
| GC-rich 1.5M | 12.12 | 1.43               | 11.94 | 1.50 | 11.75 | 1.48 |
|              |       | Minor groove width |       |      |       |      |
| AT-rich 0.5M | 4.93  | 1.05               | 4.45  | 1.15 | 5.33  | 1.41 |
| AT-rich 1.5M | 4.84  | 0.74               | 4.75  | 1.15 | 5.11  | 1.47 |
| GC-rich 0.5M | 6.12  | 1.37               | 5.94  | 1.37 | 5.90  | 1.54 |
| GC-rich 1.5M | 6.13  | 1.18               | 5.60  | 1.35 | 5.88  | 1.56 |
