# Supplementary material for: Molecular basis of Arginine and Lysine DNA sequence-dependent thermo-stability modulation
Source: PubMed Central journal article supplement (PMC8782489; doi:10.1371/journal.pcbi.1009749), 2022-01-10
Supplement: pcbi.1009749.s004.pdf [file pcbi.1009749.s004.pdf]

**S4 Table.** Averaged overall stiffness values for the entire duplex (in kJ/(mol)).

|        | AT-rich |       |       | GC-rich |       |       |
|--------|---------|-------|-------|---------|-------|-------|
|        | Na      | ZR    | ZK    | Na      | ZR    | ZK    |
| 25mM   | 16.09   | 17.50 | 16.49 | 15.69   | 16.10 | 16.18 |
| 500mM  | 14.96   | 19.30 | 18.98 | 15.93   | 19.59 | 17.54 |
| 1500mM | 16.58   | 20.45 | 19.63 | 16.02   | 19.10 | 17.55 |
