# Supplementary material for: Molecular basis of Arginine and Lysine DNA sequence-dependent thermo-stability modulation
Source: PLoS Comput Biol. 2022 Jan 10;18(1):e1009749. doi: 10.1371/journal.pcbi.1009749 (PMC8782489; doi:10.1371/journal.pcbi.1009749)
Supplement: S5 Table — (PDF) [file pcbi.1009749.s005.pdf]

**S5 Table.** Normalized overlap of the covariance matrices computed using the 10 first eigenvectors.

[illegible]
